# Supplementary material for: A Multi-Faceted Binding Assessment of Aptamers Targeting the SARS-CoV-2 Spike Protein
Source: MDPI journal article supplement (doi:10.3390/ijms25094642), 2024-04-24
Supplement: s1 [file s1]

# A Multi-Faceted Binding Assessment of Aptamers Targeting the SARS-CoV-2 Spike Protein

Laia Civit <sup>1,†</sup>, Nima Moradzadeh <sup>2,†</sup>, Anna Jonczyk <sup>2</sup>, Patrick Neckermann <sup>3</sup>, Benedikt Asbach <sup>3</sup>, David Peterhoff <sup>3,4</sup>, Ralf Wagner <sup>3,4</sup>, Michael Famulok <sup>2,5</sup>, Günter Mayer <sup>2,5,\*‡</sup>, Jørgen Kjems <sup>1,6‡</sup> and Julián Valero <sup>1,6,\*‡</sup>

<sup>1</sup> Interdisciplinary Nanoscience Center, Aarhus University, DK-8000 Aarhus, Denmark; lcivit@inano.au.dk (L.C.); jk@mbg.au.dk (J.K.)

<sup>2</sup> Life and Medical Sciences (LIMES), University of Bonn, 53121 Bonn, Germany; s0nimora@uni-bonn.de (N.M.); ajonczyk@uni-bonn.de (A.J.); m.famulok@uni-bonn.de (M.F.)

<sup>3</sup> Institute of Medical Microbiology and Hygiene, Molecular Microbiology (Virology), Regensburg University, 93053 Regensburg, Germany; patrick.neckermann@klinik.uni-regensburg.de (P.N.); benedikt.asbach@klinik.uni-regensburg.de (B.A.); david.peterhoff@klinik.uni-regensburg.de (D.P.); ralf.wagner@klinik.uni-regensburg.de (R.W.)

<sup>4</sup> Institute of Clinical Microbiology and Hygiene, University Hospital Regensburg, 93053 Regensburg, Germany

<sup>5</sup> Center of Aptamer Research & Development, University of Bonn, 53121 Bonn, Germany

<sup>6</sup> Department of Molecular Biology and Genetics, Aarhus University, DK-8000 Aarhus, Denmark

\* Correspondence: gmayer@uni-bonn.de (G.M.); jvalero@inano.au.dk (J.V.)

† These authors contributed equally to this work.

‡ These authors also contributed equally to this work.

Table S1. List of aptamers

| Name        | Sequence                                                                                                   | Selection target | Reference |
|-------------|------------------------------------------------------------------------------------------------------------|------------------|-----------|
| CoV2-RBD-1C | CAG CAC CGA CCT TGT GCT TTG GGA GTG CTG GTC CAA GGG CGT TAA TGG ACA                                        | RBD              | [2]       |
| CoV2-RBD-4C | ATC CAG AGT GAC GCA GCA TTT CAT CGG GTC CAA AAG GGG CTG CTC GGG ATT GCG GAT ATG GAC ACG T                  | RBD              |           |
| CoV2-6      | ATC CAG AGT GAC GCA GCA CCC AAG AAC AAG GAC TGC TTA GGA TTG CGA TAG GTT CGG GGG ACA CGG TGG CTT AGT A      | RBD              | [3]       |
| CoV2-6C3    | CGC AGC ACC CAA GAA CAA GGA CTG CTT AGG ATT GCG ATA GGT TCG G                                              | RBD              |           |
| Aptamer-1   | AT CCA GAG TGA CGC AGC ATC GAG TGG CTT GTT TGT AAT GTA GGG TTC CGG TCG TGG GTT GGA CAC GGT GGC TTA GT      | RBD              | [4]       |
| Aptamer-2   | AT CCA GAG TGA CGC AGC AAT TAC CGA TGG CTT GTT TGT AAT GTA GGG TTC CGT CGG ATT GGA CAC GGT GGC TTA GT      | RBD              |           |
| nCoV-S1-A1  | AG CAG CAC AGA GGT CAG ATG CCG CAG GCA GCT GCC ATT AGT CTC TAT CCG TGA CGG TAT GCC TAT GCG TGC TAC CGT GAA | S1               | [5]       |
| nCoV-S1-A2  | AG CAG CAC AGA GGT CAG ATG GCA GCT AAG CAG GCG GCT CAC AAA ACC ATT CGC ATG CGG CCC TAT GCG TGC TAC CGT GAA | S1               |           |

|         |                                                                                                             |                  |     |
|---------|-------------------------------------------------------------------------------------------------------------|------------------|-----|
| MSA1-T3 | TC CGG TTA ATT TAT GCT CTA CCC GTC CAC CTA CCG GA                                                           | S1               | [6] |
| MSA5-T4 | CT TCC ACG GGT TTG GCG TCG GGC CTG GCG GGG GGA TAG TGC GGT GGA AG                                           | S1               |     |
| SP6.41  | CAA CCC ATG GTA GGT ATT GCT TGG TAG GGA TAG TGG GCT TG                                                      | S                | [7] |
| SP6.34C | CCC ATG GTA GGT ATT GCT TGG TAG CGA TAG TGG G                                                               | Control sequence |     |
| RBD-PB6 | GGG GCC ACC AAC GAC AUU UGU AAU UCC UGG ACC GAU ACU UCC GUC AGG ACA GAG GUU GAU AUA AAU AGU GCC CAU GGA UCC | RBD              | [1] |

Table S2: Modifications, buffers and refolding conditions of the tested published aptamers via BLI and ELONA.

| Aptamer     | Modification | Binding Buffer                                                                          | Refolding                                             |
|-------------|--------------|-----------------------------------------------------------------------------------------|-------------------------------------------------------|
| MSA1-T3     | w/wo 5'-     | 30 mM HEPES, 6 mM KCl, 150 mM NaCl, 2.5 mM CaCl <sub>2</sub> , 2.5 mM MgCl <sub>2</sub> | 5 min 90°C and 20 min RT                              |
| MSA5-T4     | Biotin       |                                                                                         |                                                       |
| CoV2-RBD-1C | w/wo 5'-     | PBS with 1 mM MgCl <sub>2</sub>                                                         | 5 min 90°C, 5 min ice and 10 min RT                   |
| CoV2-RBD-4C | Biotin       |                                                                                         |                                                       |
| CoV2-6C3    | w/wo 5'-     | PBS with 1 mM MgCl <sub>2</sub>                                                         | 5 min 90°C, 5 min ice and 10 min RT                   |
|             | Biotin       |                                                                                         |                                                       |
| Aptamer-1   | w/wo 5'-     | PBS with 1 mM MgCl <sub>2</sub>                                                         | Not specified; 5 min 90°C, 5 min ice and 10 min RT    |
| Aptamer-2   | Biotin       |                                                                                         |                                                       |
| nCoV-S1-A1  | w/wo 5'-     | PBS with 1 mM MgCl <sub>2</sub>                                                         | 5 min 90°C and slow cooling to RT                     |
| nCoV-S1-A2  | Biotin       |                                                                                         |                                                       |
| SP6.41      | w/wo 5'-     | PBS with 3 mM MgCl <sub>2</sub>                                                         | 5 min 95°C                                            |
| SP6.34c     | Biotin       |                                                                                         |                                                       |
| RBD-PB6     | w/wo 3'-     | PBS with 1 mM MgCl <sub>2</sub>                                                         | 2 min 90°C, 3 min 65°C, 3 min 37°C, and cooling to RT |
|             | Biotin       |                                                                                         |                                                       |

Table S3: Modifications, buffers and refolding conditions of the tested published aptamers via flow cytometry. SA: Streptavidin

| Aptamer     | Modification     | Binding Buffer                                                                         | Refolding                |
|-------------|------------------|----------------------------------------------------------------------------------------|--------------------------|
| MSA1-T3     | Biot/SA-ATTO647N | 30 mM HEPES, 6mM KCl, 150 mM NaCl, 2.5 mM CaCl <sub>2</sub> , 2.5 mM MgCl <sub>2</sub> | 5 min 90°C and 10 min RT |
| MSA5-T4     |                  |                                                                                        |                          |
| CoV2-RBD-4C | Biot/SA-ATTO647N | PBS with 1 mM MgCl <sub>2</sub>                                                        | 5 min 90°C and 10 min RT |
| CoV2-RBD-1C |                  |                                                                                        |                          |
| CoV2-6C3    | Biot/SA-ATTO647N | PBS with 1 mM MgCl <sub>2</sub>                                                        | 5 min 90°C and 10 min RT |
| Aptamer-1   | Biot/SA-ATTO647N | PBS with 1 mM MgCl <sub>2</sub>                                                        | 5 min 90°C and 10 min RT |
| Aptamer-2   |                  |                                                                                        |                          |
| nCoV-S1-A1  | Biot/SA-ATTO647N | PBS with 1 mM MgCl <sub>2</sub>                                                        | 5 min 90°C and 10 min RT |
| nCoV-S1-A2  |                  |                                                                                        |                          |
| RBD-PB6     | Biot/SA-ATTO647N | PBS with 1 mM MgCl <sub>2</sub>                                                        | 5 min 90°C and 10 min RT |
| SP6.41      | Biot/SA-ATTO647N | PBS with 3 mM MgCl <sub>2</sub>                                                        | 5 min 90°C and 10 min RT |
| SP6.34C     |                  |                                                                                        |                          |

Table S4: SARS-CoV-2 related proteins and control proteins used.

| Protein                       | Amino acids | Tag             | Reference/supplier                                  |
|-------------------------------|-------------|-----------------|-----------------------------------------------------|
| SARS-CoV-2 RBD WT             | 319 to 532  | His             | [8]                                                 |
| SARS-CoV-2 RBD                | 319-591     | Ctag            | Cat. Num.: S2-45A-001<br>ExpreS2ion Biotechnologies |
| SARS-CoV-2 S1 WT              | 16-685      | His             | Cat. Num.: 40591-V08H<br>SinoBiological             |
| SARS-CoV-2 S1 B.1.1.7 (alpha) | 1-685       | His             | Cat. Num.: 40591-V08H12<br>SinoBiological           |
| SARS-CoV-2 Spike WT           | 1-1208      | His             | [8]                                                 |
| SARS-CoV-2 Spike WT           | 1-1208      | His & TwinStrep | [7]                                                 |
| SARS-CoV-2 Spike WT           | 16-1208     | Ctag            | Cat. Num.: S2-46A-001<br>ExpreS2ion Biotechnologies |
| SARS-CoV-2 Spike Omicron BA.2 |             | His             | [8]                                                 |
| Hemagglutinin                 |             | His             | Wagner lab                                          |
| Rb17c Nanobody                |             | His             | [9]                                                 |

## Supporting figures

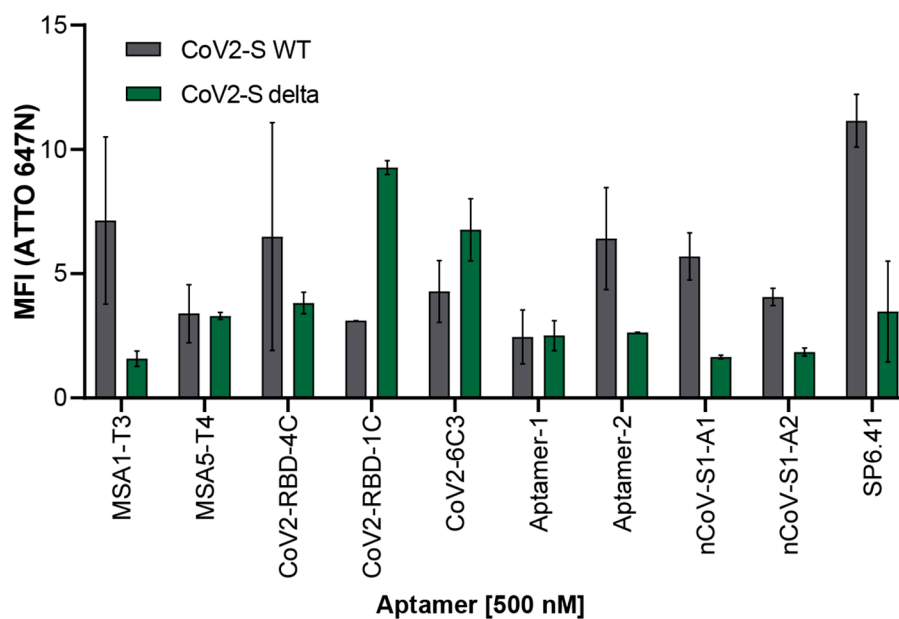

**Figure S1:** Binding analysis of aptamers targeting spike SARS-CoV-2 protein against wild-type (WT) and delta trimeric constructs via flow cytometry. Biotinylated aptamers were conjugated to ATTO647N-Streptavidin bioreagent. The proteins were immobilized on Dynabeads™ His-Tag Isolation and Pulldown (Invitrogen) and incubated with 500 nM labelled oligonucleotide for 30 mins at 25 °C (or 37 °C for SP6.41) in the respective binding buffers lacking Tween-20. (n=1 duplicates, mean  $\pm$  SD).

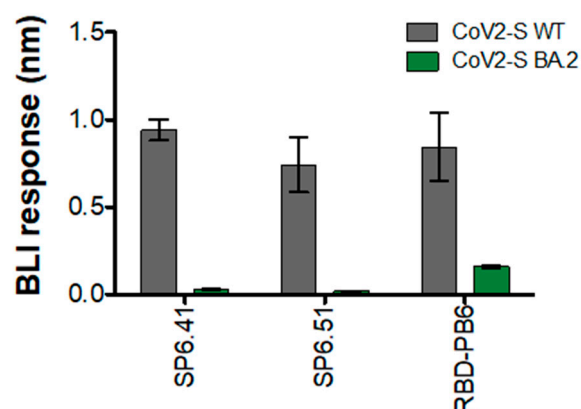

**Figure S2:** BLI binding analysis of SP6 variants and RBD-PB6 aptamers towards WT and omicron BA.2 spike protein variants. In these experiments immobilized aptamers were tested against the two protein variants at 100 nM each (n = 2, mean  $\pm$  SD).

## References

1. Valero, J.; Civit, L.; Dupont, D.M.; Selnhin, D.; Reinert, L.S.; Idorn, M.; Israels, B.A.; Bednarz, A.M.; Bus, C.; Asbach, B.; et al. A serum-stable RNA aptamer specific for SARS-CoV-2 neutralizes viral entry. *Proceedings of the National Academy of Sciences* **2021**, *118*, e2112942118, doi:doi:10.1073/pnas.2112942118.
2. Song, Y.; Song, J.; Wei, X.; Huang, M.; Sun, M.; Zhu, L.; Lin, B.; Shen, H.; Zhu, Z.; Yang, C. Discovery of Aptamers Targeting the Receptor-Binding Domain of the SARS-CoV-2 Spike Glycoprotein. *Analytical Chemistry* **2020**, *92*, 9895-9900, doi:10.1021/acs.analchem.0c01394.
3. Sun, M.; Liu, S.; Wei, X.; Wan, S.; Huang, M.; Song, T.; Lu, Y.; Weng, X.; Lin, Z.; Chen, H.; et al. Aptamer Blocking Strategy Inhibits SARS-CoV-2 Virus Infection. *Angewandte Chemie International Edition* **2021**, *60*, 10266-10272, doi:<https://doi.org/10.1002/anie.202100225>.
4. Liu, X.; Wang, Y.-l.; Wu, J.; Qi, J.; Zeng, Z.; Wan, Q.; Chen, Z.; Manandhar, P.; Cavener, V.S.; Boyle, N.R.; et al. Neutralizing Aptamers Block S/RBD-ACE2 Interactions and Prevent Host Cell Infection. *Angewandte Chemie International Edition* **2021**, *60*, 10273-10278, doi:<https://doi.org/10.1002/anie.202100345>.
5. Yang, G.; Li, Z.; Mohammed, I.; Zhao, L.; Wei, W.; Xiao, H.; Guo, W.; Zhao, Y.; Qu, F.; Huang, Y. Identification of SARS-CoV-2-against aptamer with high neutralization activity by blocking the RBD domain of spike protein 1. *Signal Transduction and Targeted Therapy* **2021**, *6*, 227, doi:10.1038/s41392-021-00649-6.
6. Li, J.; Zhang, Z.; Gu, J.; Stacey, H.D.; Ang, J.C.; Capretta, A.; Filipe, C.D.M.; Mossman, K.L.; Balion, C.; Salena, B.J.; et al. Diverse high-affinity DNA aptamers for wild-type and B.1.1.7 SARS-CoV-2 spike proteins from a pre-structured DNA library. *Nucleic Acids Res* **2021**, *49*, 7267-7279, doi:10.1093/nar/gkab574.
7. Schmitz, A.; Weber, A.; Bayin, M.; Breuers, S.; Fieberg, V.; Famulok, M.; Mayer, G. A SARS-CoV-2 Spike Binding DNA Aptamer that Inhibits Pseudovirus Infection by an RBD-Independent Mechanism\*\*. *Angewandte Chemie International Edition* **2021**, *60*, 10279-10285, doi:<https://doi.org/10.1002/anie.202100316>.
8. Peterhoff, D.; Glück, V.; Vogel, M.; Schuster, P.; Schütz, A.; Neubert, P.; Albert, V.; Frisch, S.; Kiessling, M.; Pervan, P.; et al. A highly specific and sensitive serological assay detects SARS-CoV-2 antibody levels in COVID-19 patients that correlate with neutralization. *Infection* **2021**, *49*, 75-82, doi:10.1007/s15010-020-01503-7.
9. Vaneycken, I.; Devoogdt, N.; Van Gassen, N.; Vincke, C.; Xavier, C.; Wernery, U.; Muyldermans, S.; Lahoutte, T.; Caveliers, V. Preclinical screening of anti-HER2 nanobodies for molecular imaging of breast cancer. *The FASEB Journal* **2011**, *25*, 2433-2446, doi:<https://doi.org/10.1096/fj.10-180331>.
